# Supplementary material
Source: PubMed Central journal article supplement (PMC6693339)

## SUPPLEMENTARY INFORMATION

### Synthesis and *in vitro* PDT evaluation of new porphyrins containing *meso*-epoxymethyl cationic groups

Jaqueline Carneiro<sup>1</sup>, Alan Gonçalves<sup>1</sup>, Zehua Zhou<sup>2</sup>, Kaitlin E. Griffin<sup>2</sup>,  
Nichole E. Kaufman<sup>2</sup> and M. Graça H. Vicente<sup>2\*</sup>

<sup>1</sup>Department of Pharmaceutical Sciences, Federal University of Paraná, Curitiba, PR, Brazil

<sup>2</sup>Department of Chemistry, Louisiana State University, Baton Rouge, LA, USA

### TABLE OF CONTENTS

|                                                                                               |    |
|-----------------------------------------------------------------------------------------------|----|
| ▪ Spectral data.....                                                                          | 2  |
| ▪ 5,10,15-tri(3,5-dimethoxyphenyl)-20-(4-pyridyl) porphyrin <b>1</b> .....                    | 2  |
| ♦ Porphyrin <b>1</b> <sup>1</sup> H-NMR.....                                                  | 2  |
| ♦ Porphyrin <b>1</b> <sup>13</sup> C-NMR.....                                                 | 2  |
| ♦ Porphyrin <b>1</b> ESI.....                                                                 | 3  |
| ♦ Porphyrin <b>1</b> UV-Vis.....                                                              | 3  |
| ▪ 5-(4-dimethylaminophenyl)-10,15,20-triphenyl porphyrin <b>2</b> .....                       | 4  |
| ♦ Porphyrin <b>2</b> <sup>1</sup> H-NMR.....                                                  | 4  |
| ♦ Porphyrin <b>2</b> <sup>13</sup> C-NMR.....                                                 | 4  |
| ♦ Porphyrin <b>2</b> ESI.....                                                                 | 5  |
| ♦ Porphyrin <b>2</b> UV-Vis.....                                                              | 5  |
| ▪ 5-(1-methylpyridinium-4-yl)-10,15,20-tri(3,5-dimethoxyphenyl) porphyrin <b>3</b> .....      | 6  |
| ♦ Porphyrin <b>3</b> <sup>1</sup> H-NMR.....                                                  | 6  |
| ♦ Porphyrin <b>3</b> <sup>13</sup> C-NMR.....                                                 | 6  |
| ♦ Porphyrin <b>3</b> ESI.....                                                                 | 7  |
| ♦ Porphyrin <b>3</b> UV-Vis.....                                                              | 7  |
| ▪ 5-(N,N,N-trimethyl-4-aminiumphenyl)-10,15,20-triphenyl porphyrin <b>4</b> .....             | 8  |
| ♦ Porphyrin <b>4</b> <sup>1</sup> H-NMR.....                                                  | 8  |
| ♦ Porphyrin <b>4</b> <sup>13</sup> C-NMR.....                                                 | 8  |
| ♦ Porphyrin <b>4</b> ESI.....                                                                 | 9  |
| ♦ Porphyrin <b>4</b> UV-Vis.....                                                              | 9  |
| ▪ 5-(1-epoxymethylpyridinium-4-yl)-10,15,20-tri(3,5-dimethoxyphenyl) porphyrin <b>5</b> ..... | 10 |
| ♦ Porphyrin <b>5</b> <sup>1</sup> H-NMR.....                                                  | 10 |
| ♦ Porphyrin <b>5</b> <sup>13</sup> C-NMR.....                                                 | 10 |
| ♦ Porphyrin <b>5</b> ESI.....                                                                 | 11 |
| ♦ Porphyrin <b>5</b> UV-Vis.....                                                              | 11 |
| ▪ 5-(N-dimethylepoxymethyl-4-aminiumphenyl)-10,15,20-triphenyl porphyrin <b>6</b> .....       | 12 |
| ♦ Porphyrin <b>6</b> <sup>1</sup> H-NMR.....                                                  | 12 |
| ♦ Porphyrin <b>6</b> <sup>13</sup> C-NMR.....                                                 | 12 |
| ♦ Porphyrin <b>6</b> ESI.....                                                                 | 13 |
| ♦ Porphyrin <b>6</b> UV-Vis.....                                                              | 13 |
| ▪ Fluorescence emission of porphyrins <b>1-6</b> .....                                        | 14 |
| ▪ Singlet oxygen generation by porphyrins <b>1-6</b> and MB.....                              | 14 |

### <sup>1</sup>H NMR of porphyrin 1

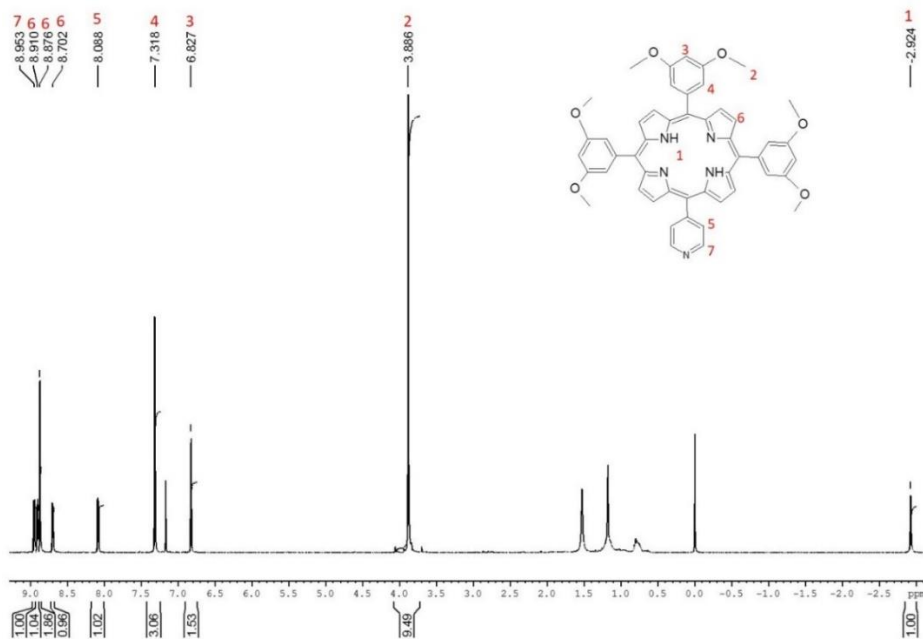

### <sup>13</sup>C NMR of porphyrin 1

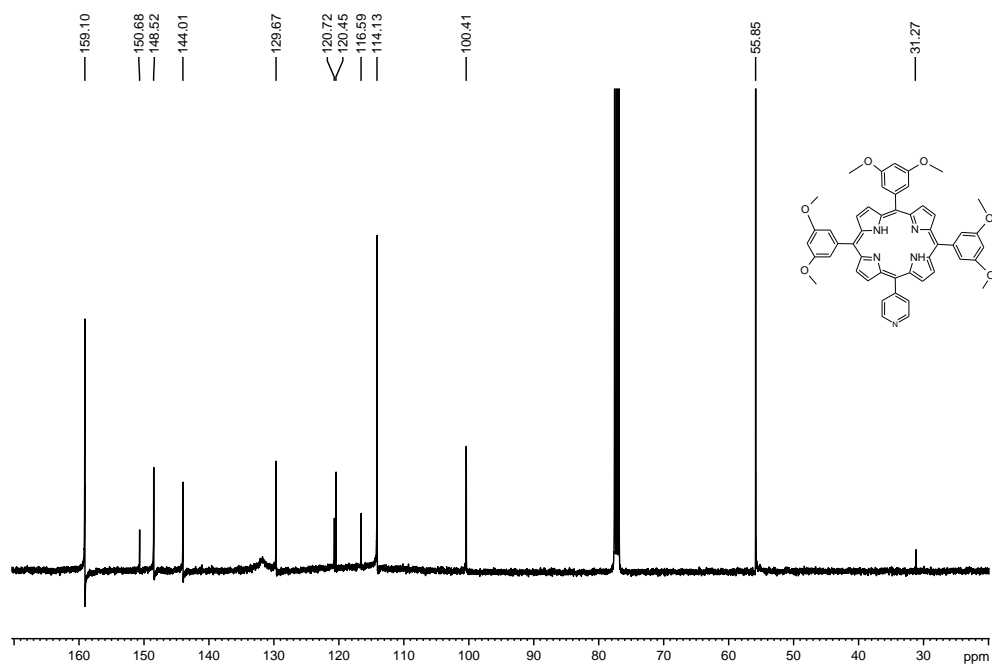

Mass spectrum of porphyrin 1  
Mass match = 96.58%. Abs Diff (ppm) = 1.52.

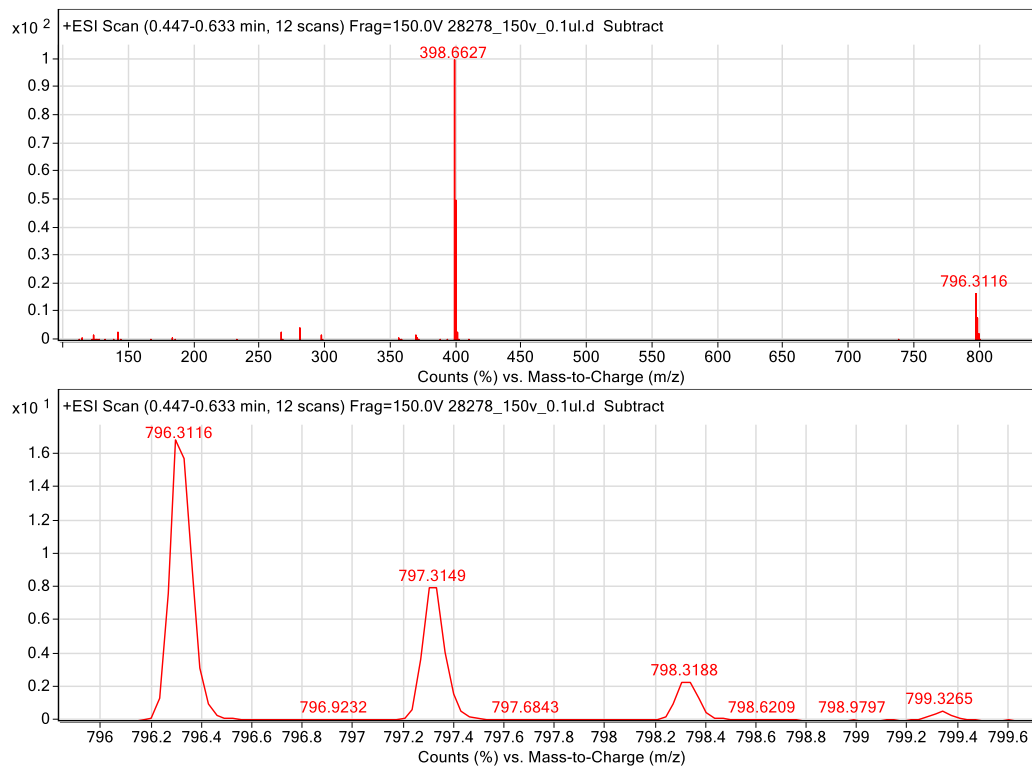

UV-Vis of of porphyrin 1

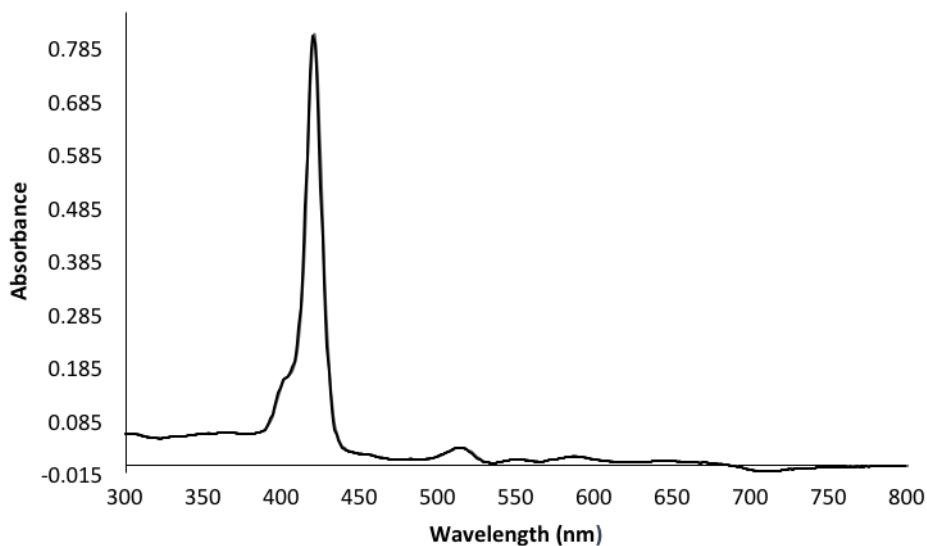

### $^1\text{H}$ NMR of porphyrin 2

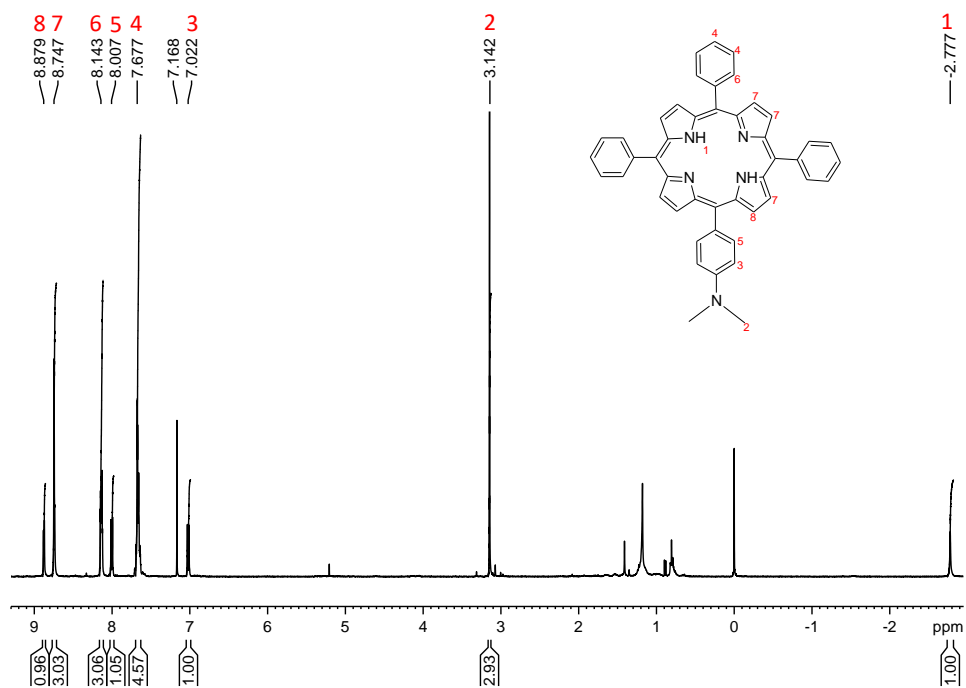

### $^{13}\text{C}$ NMR of porphyrin 2

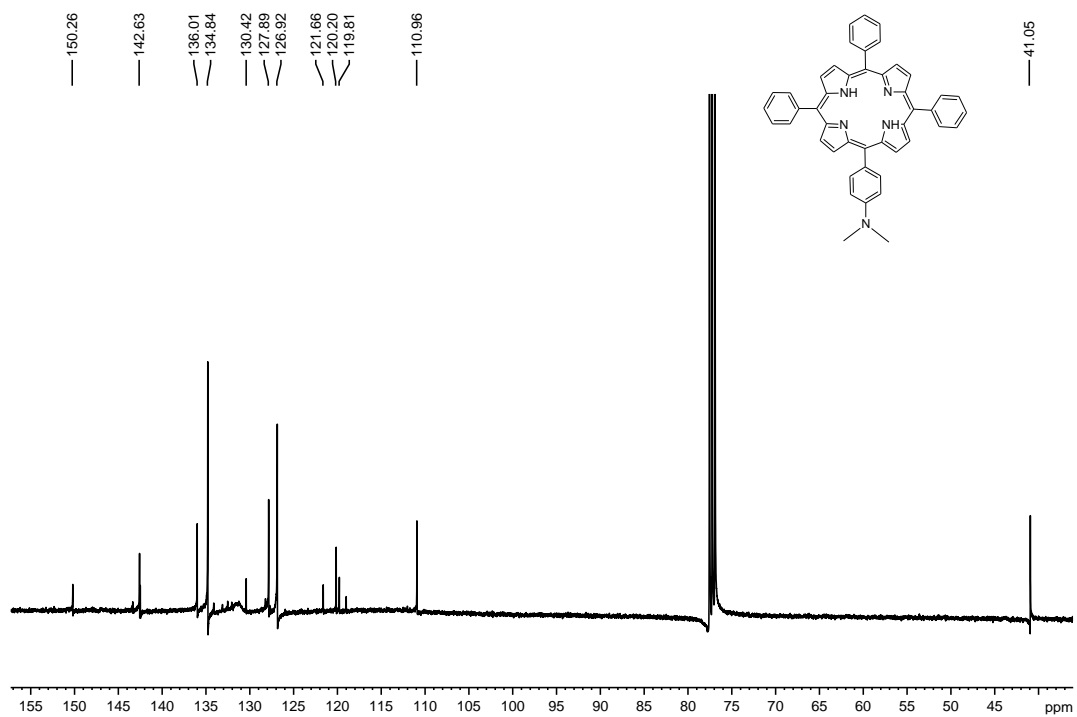

Mass spectrum of porphyrin 2  
Mass match = 98.35%. Abs Diff (ppm) = 1.12.

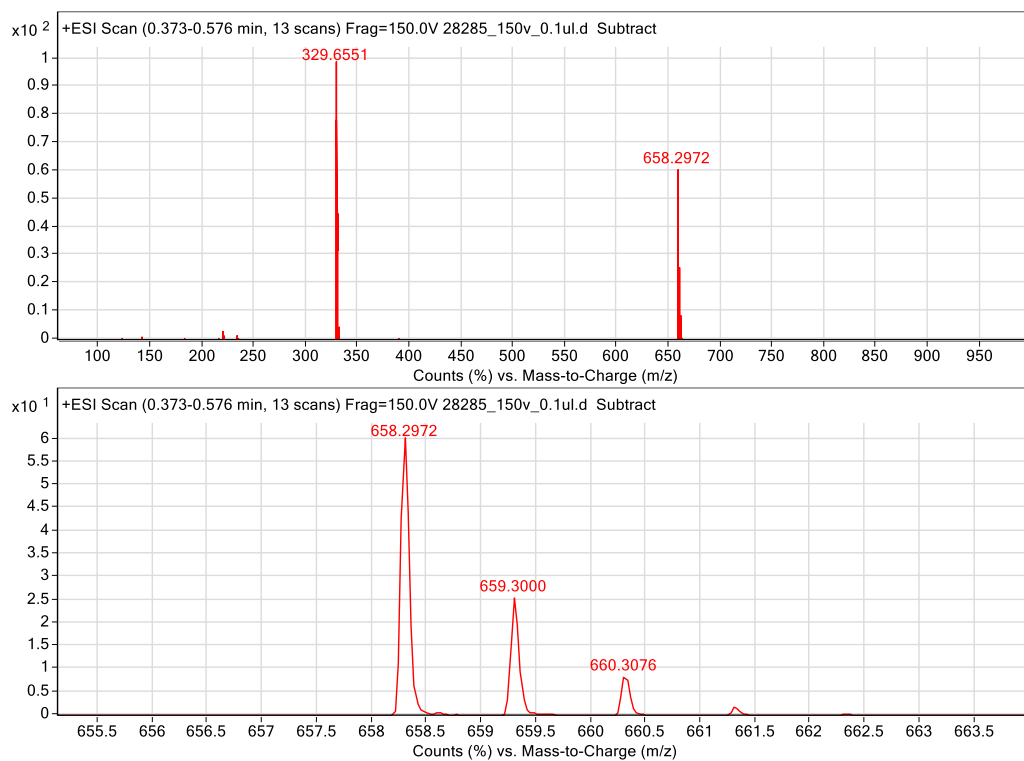

UV-Vis of porphyrin 2

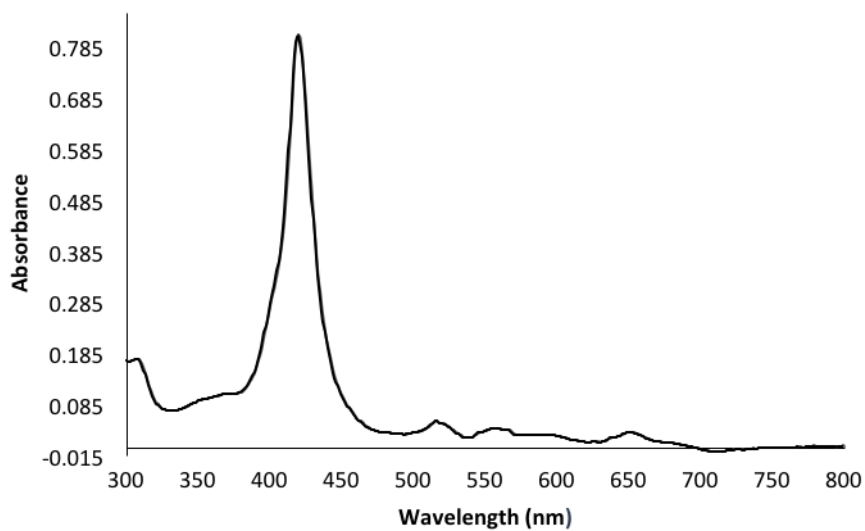

### <sup>1</sup>H NMR of porphyrin 3

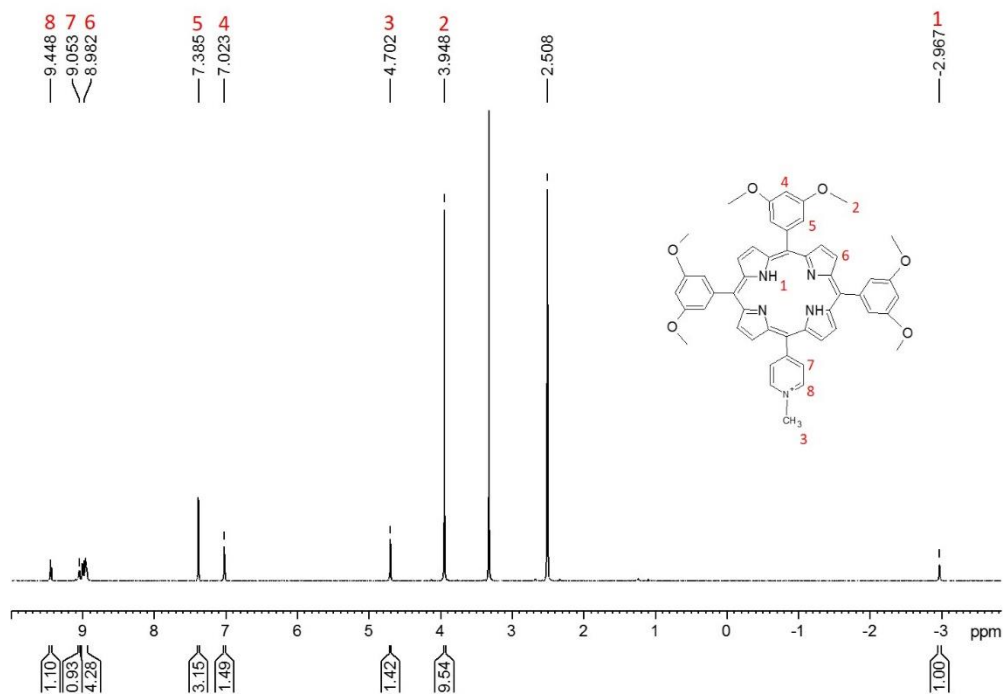

### <sup>13</sup>C NMR of porphyrin 2

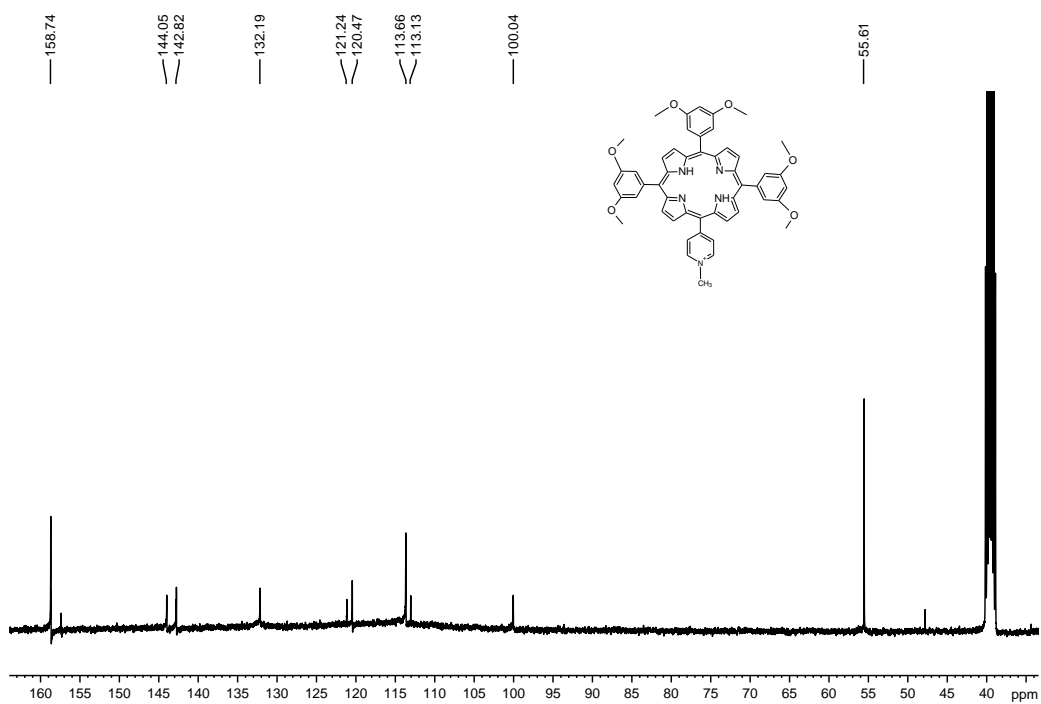

### Mass spectrum of porphyrin 3

Mass match = 99.14%. Abs Diff (ppm) = 0.75.

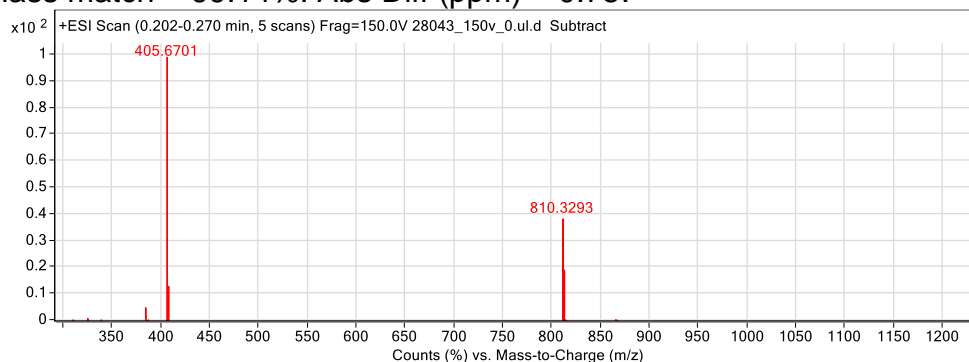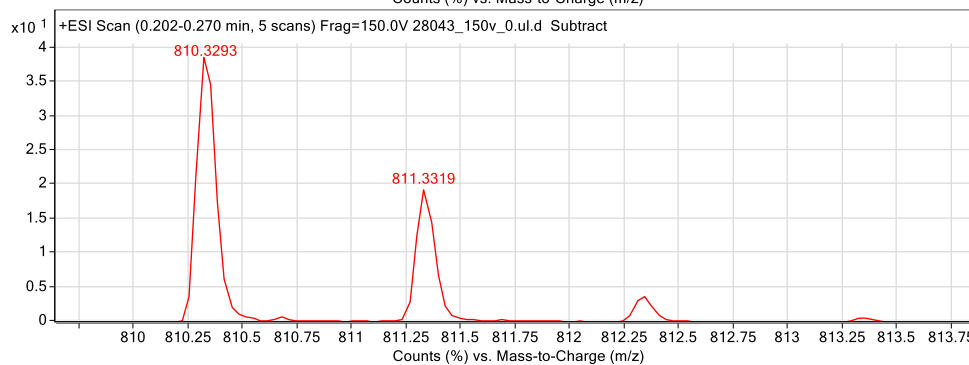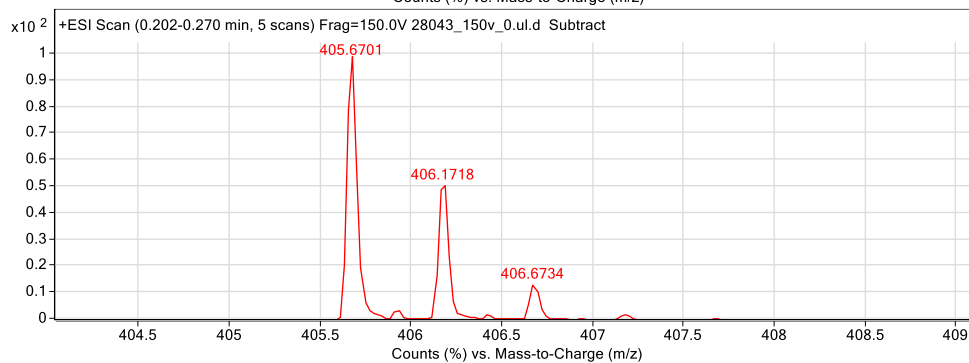

### UV-Vis of of porphyrin 3

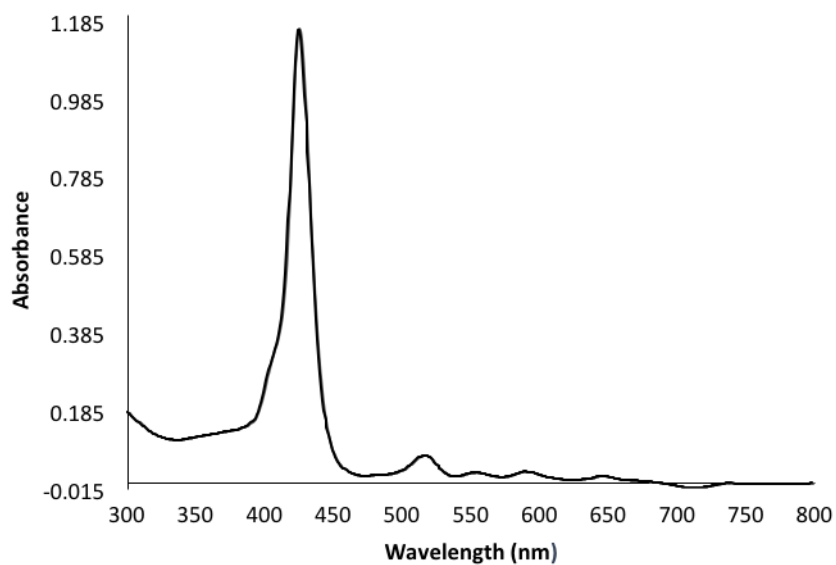

### $^1\text{H}$ NMR of porphyrin 4

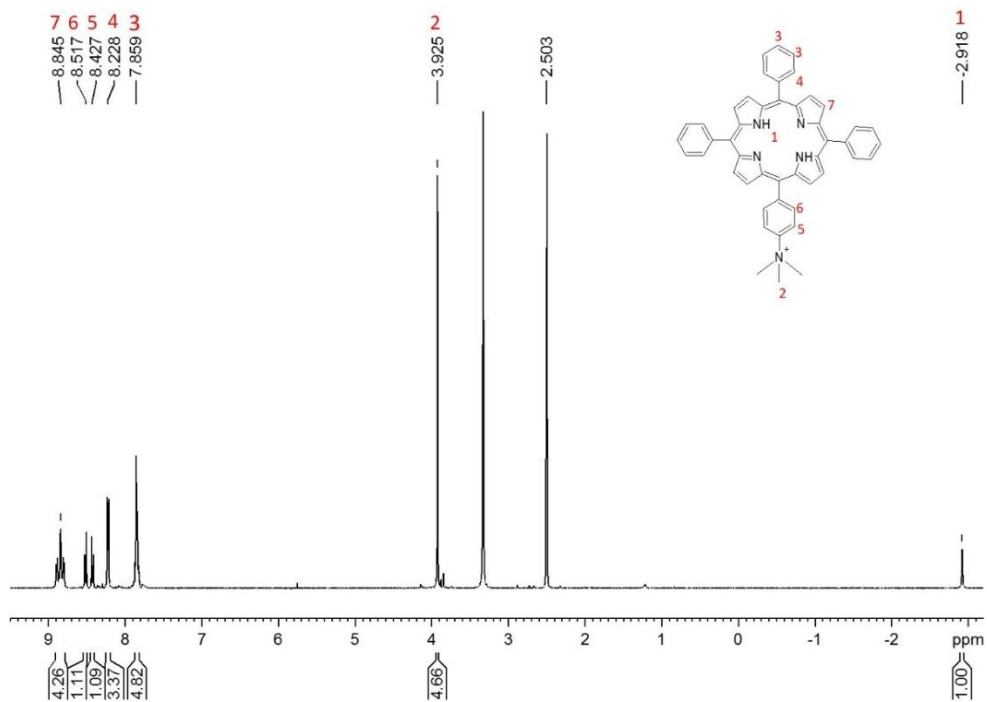

### $^{13}\text{C}$ NMR of porphyrin 4

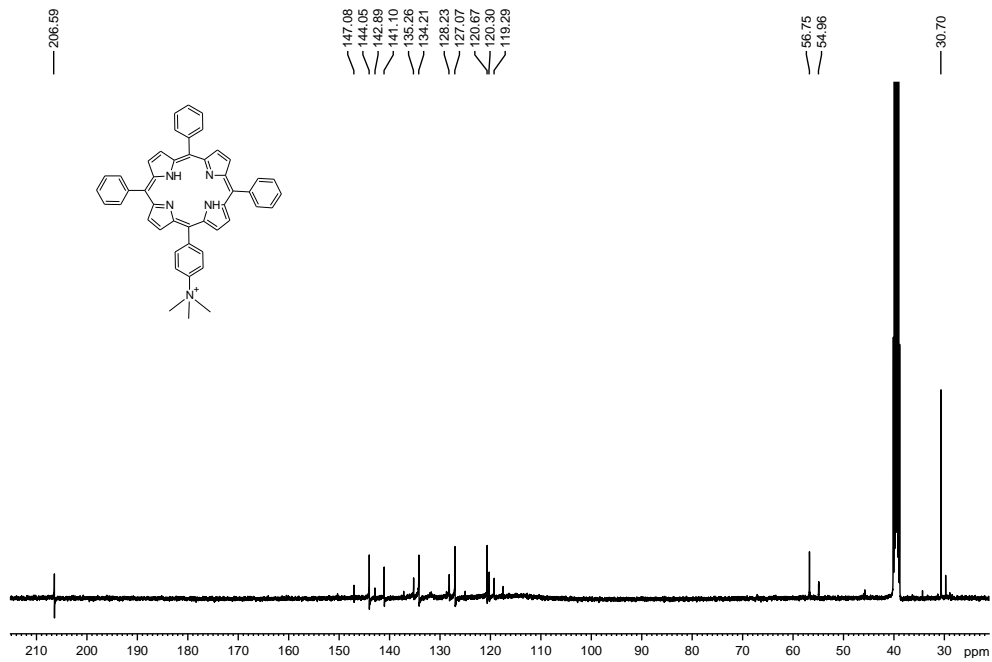



## Mass spectrum of porphyrin 4

Mass match = 96.68%. Abs Diff (ppm) = 1.58

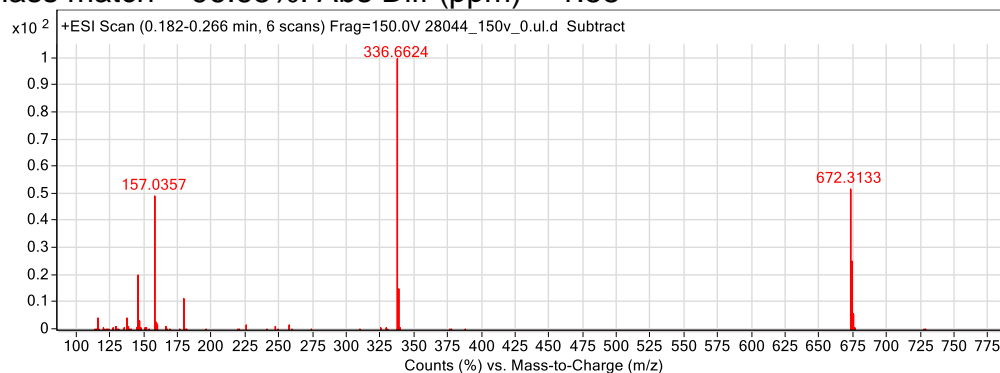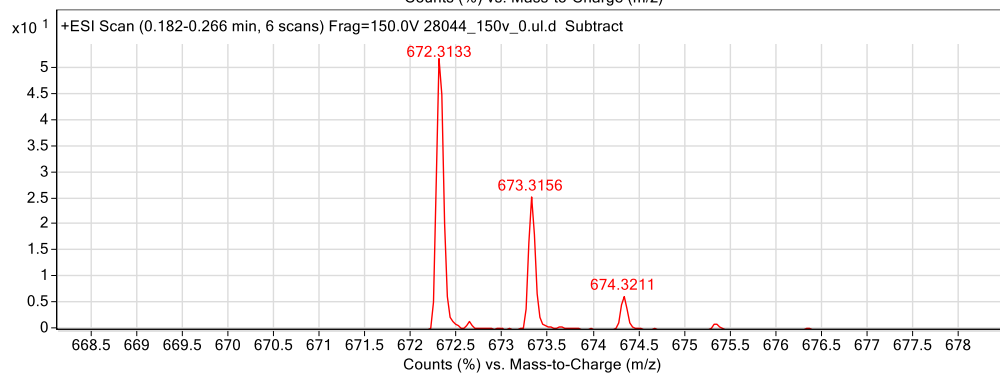

## UV-Vis of of porphyrin 4

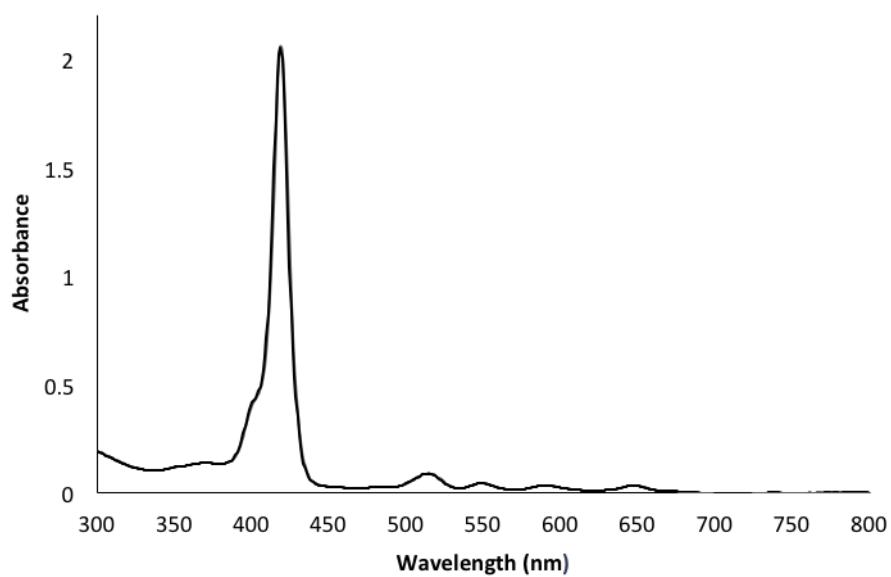

# <sup>1</sup>H NMR of porphyrin 5

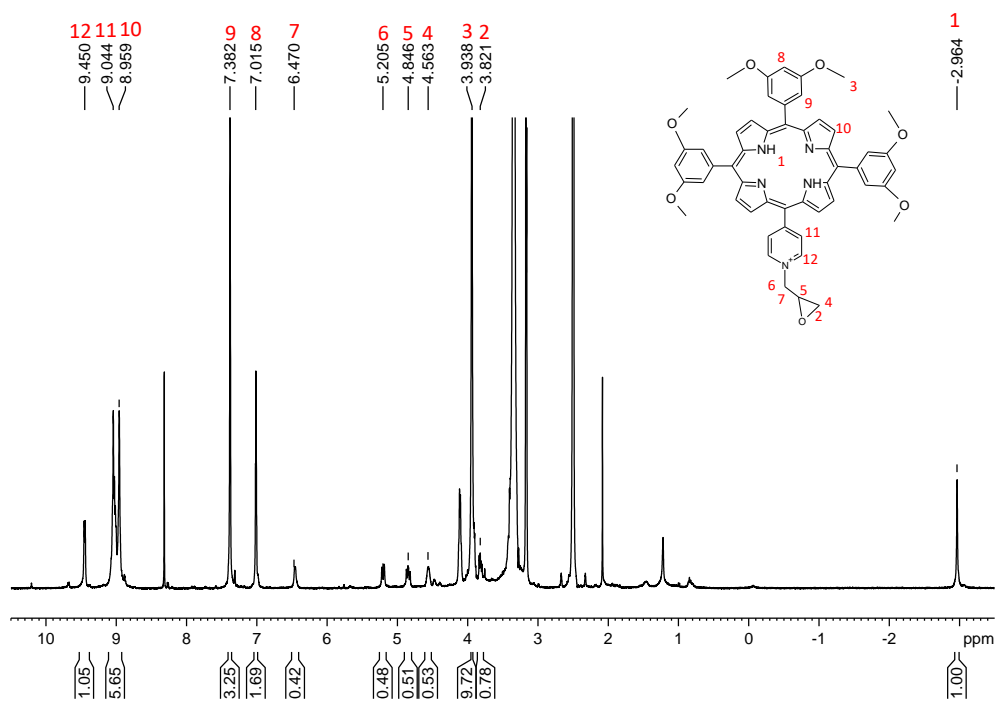

# <sup>13</sup>C NMR of porphyrin 5

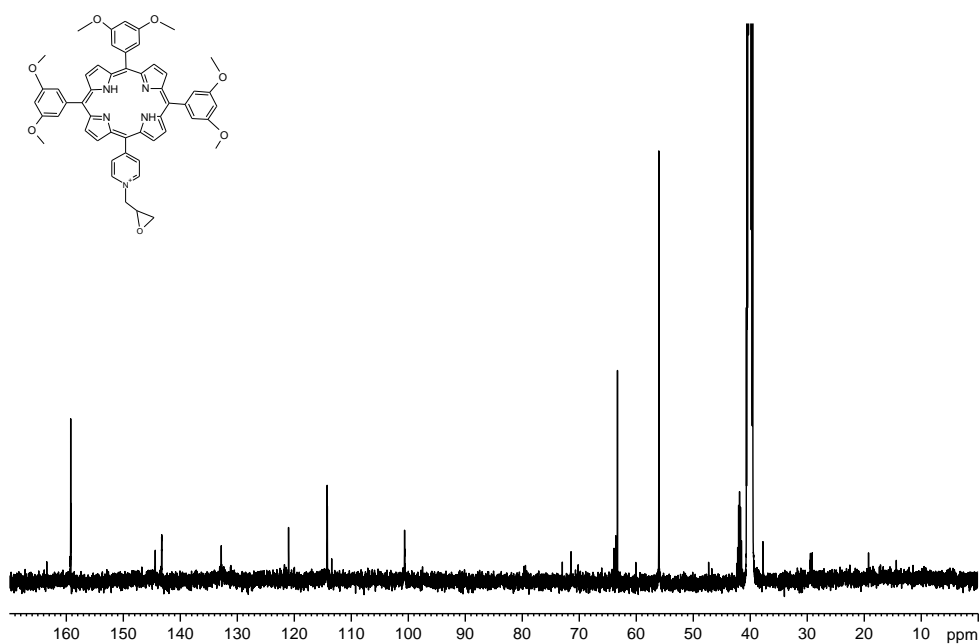

## Mass spectrum of porphyrin 5

Mass match = 99.94 %. Abs Diff (ppm) = 0.2.

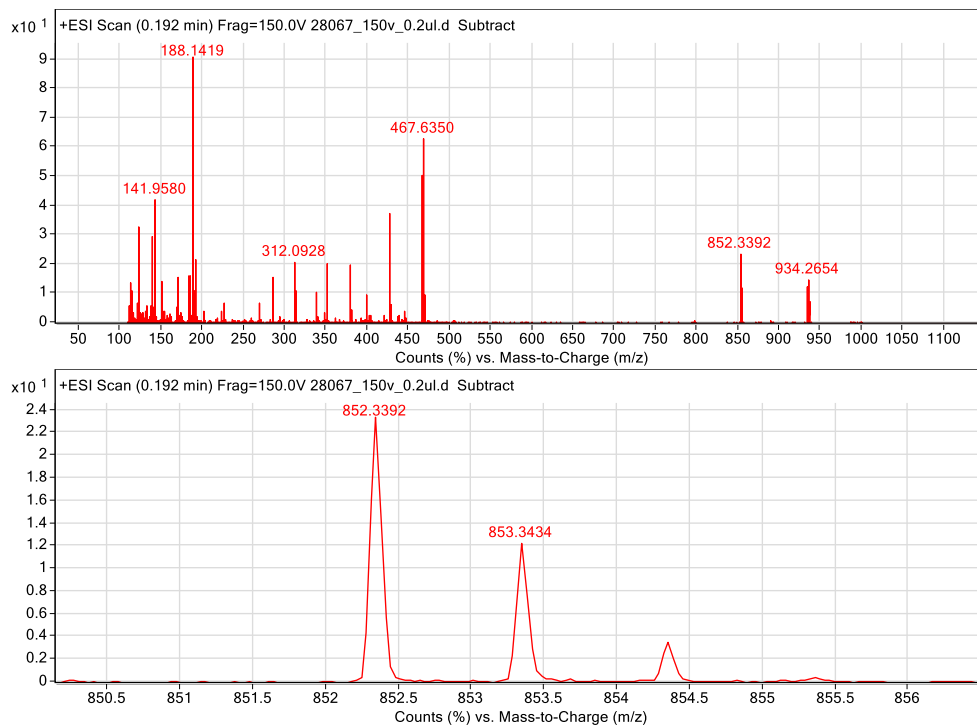

## UV-Vis of porphyrin 5

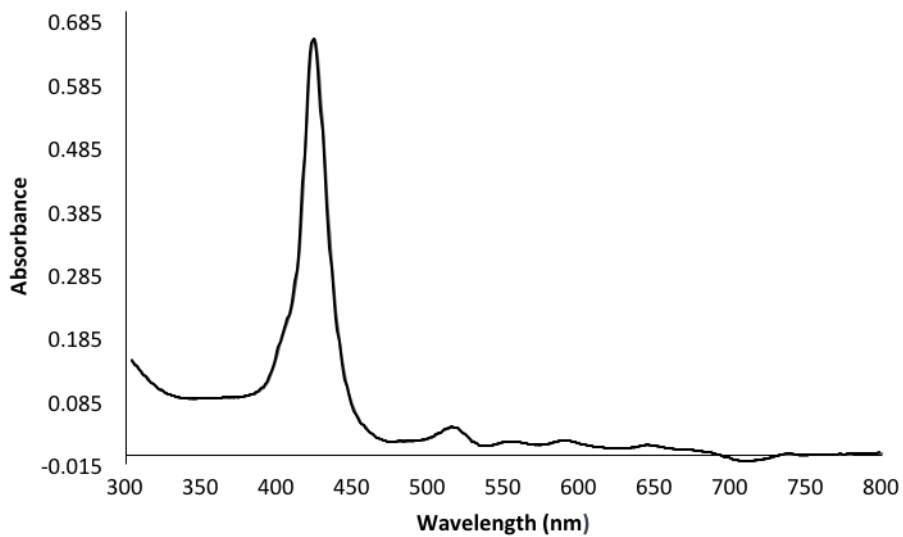

### <sup>1</sup>H NMR of porphyrin **6**

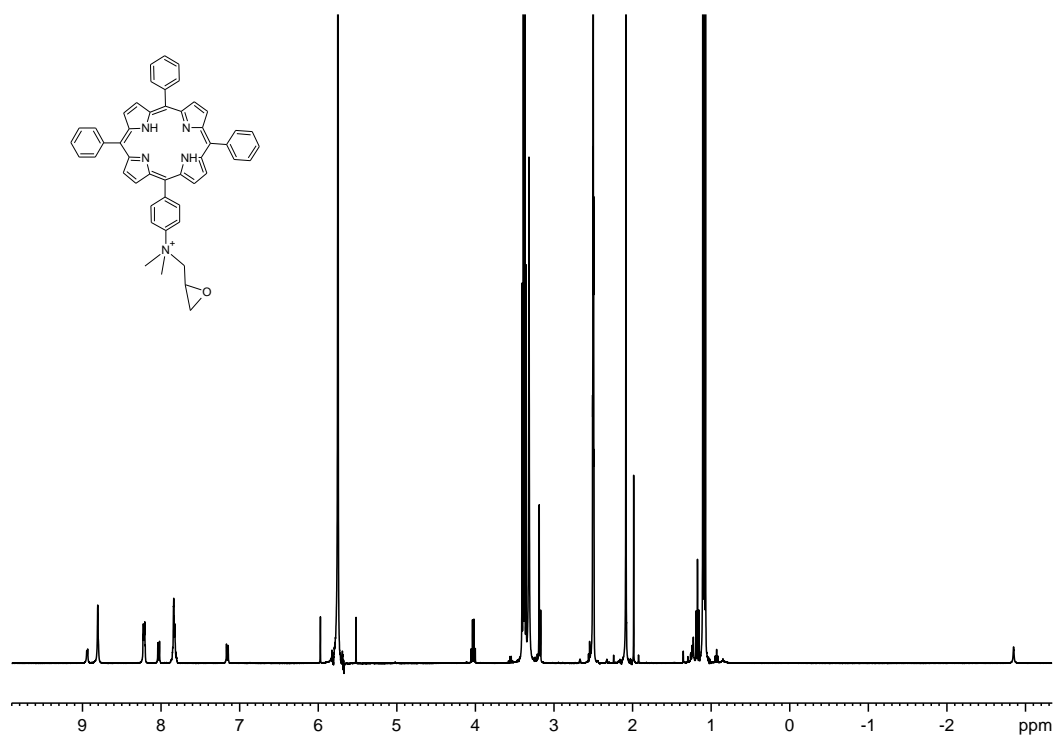

### <sup>13</sup>C NMR of porphyrin **6**

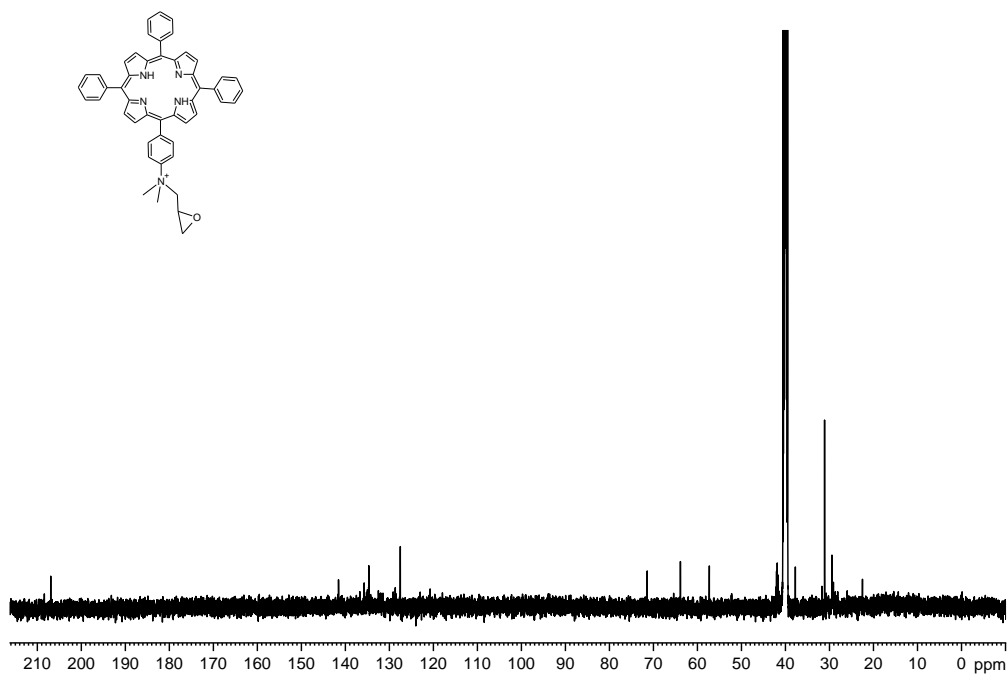

## Mass spectrum of porphyrin 6

Mass match = 97.98%. Abs Diff (ppm) = 1.2.

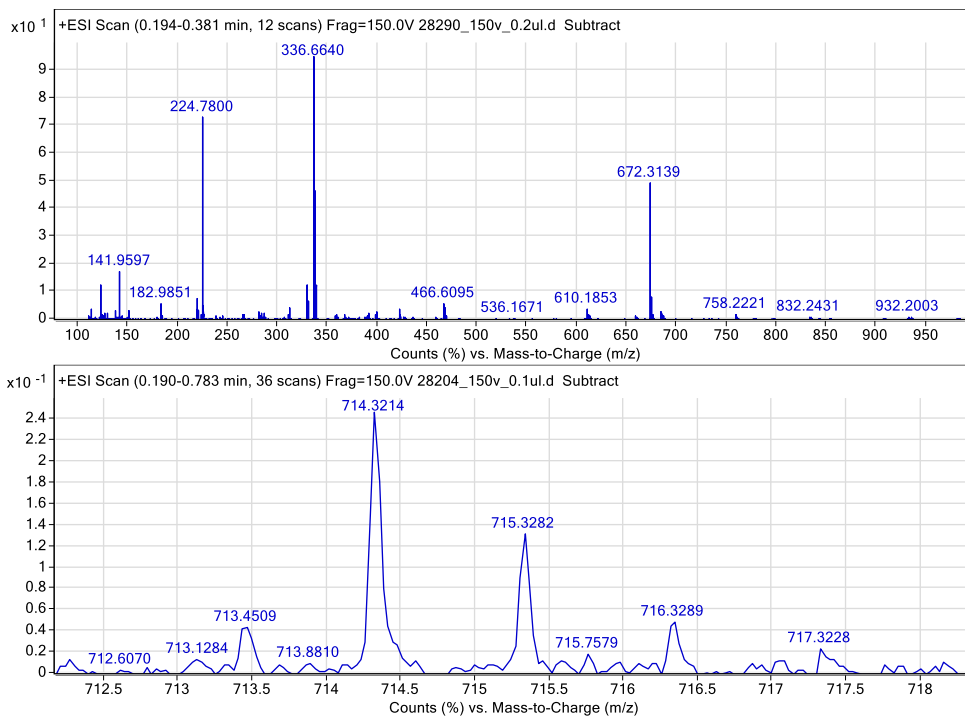

## UV-Vis of porphyrin 6

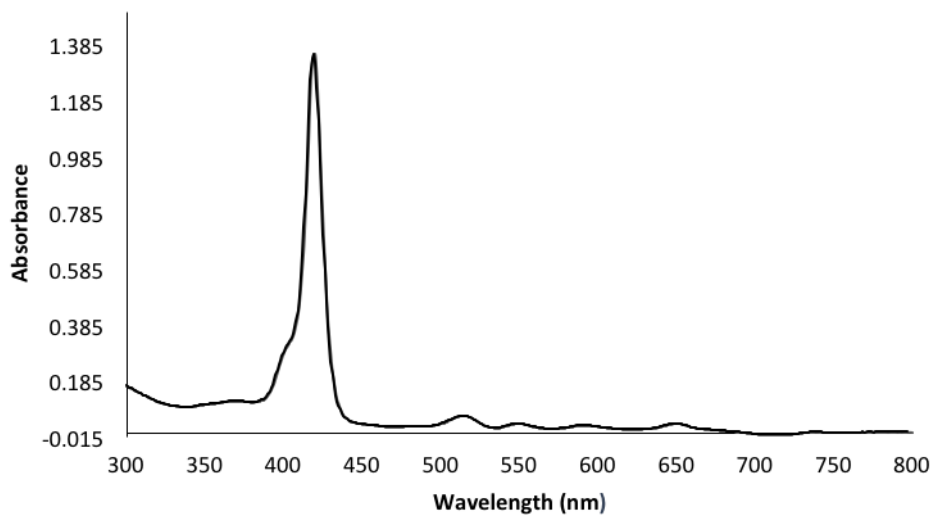

Fluorescence emission of porphyrins **1** (red), **2** (yellow), **3** (green), **4** (cyan), **5** (purple) and **6** (blue) in DMSO at a concentration of  $2 \times 10^{-6}$  M.

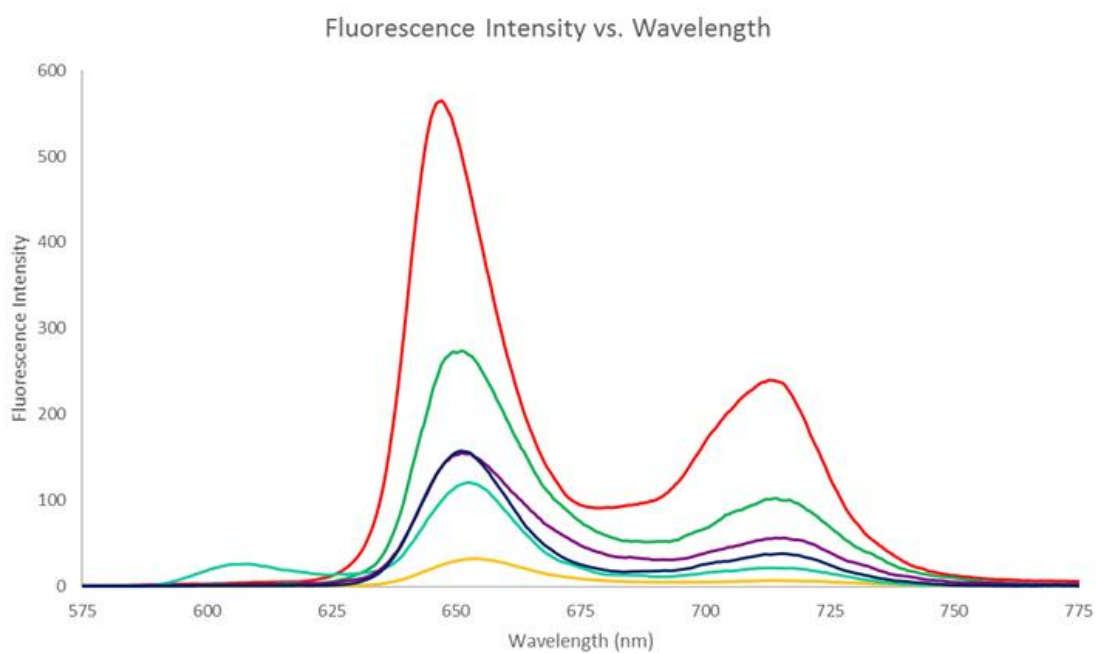

Singlet oxygen generation by porphyrins **1-6** and MB

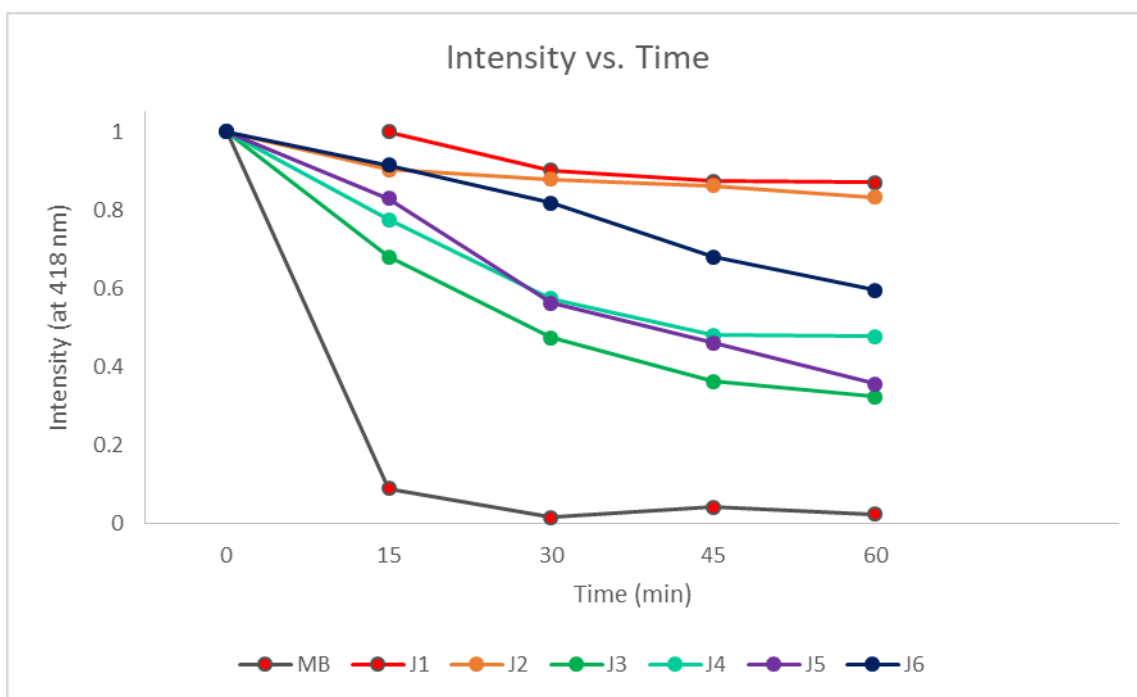

Supplement: NIHMS1045515-supplement-PDF.pdf [file NIHMS1045515-supplement-PDF.pdf]
